# Supplementary material for: Development and validation of the RCOS prognostic index: a bedside multivariable logistic regression model to predict hypoxaemia or death in patients with SARS-CoV-2 infection
Source: bioRxiv or medRxiv preprint supplement (doi:10.1101/2021.03.29.21254393), 2021-04-06
Supplement: Supplementary file [file media-1.pdf]

# Supplementary material

## Contents

|                                                                          |    |
|--------------------------------------------------------------------------|----|
| Software .....                                                           | 2  |
| Model development .....                                                  | 2  |
| Stage 1 .....                                                            | 2  |
| Stage 2 .....                                                            | 3  |
| Stage 3 .....                                                            | 6  |
| Stage 4 .....                                                            | 7  |
| Model performance in the development cohort .....                        | 8  |
| Predicted risk given by prognostic scores in the validation cohort ..... | 9  |
| Model performance to predict mortality in the validation cohort .....    | 11 |
| References .....                                                         | 13 |

## Software

Statistical analysis was performed using Stata 14.2, except for generalised additive models (GAM), which were performed in R (version 4.0.3) with the mgcv library (version 1.8-33) [1]. Missing data were handled by multiple imputation using chained equations and predictive mean matching (with five nearest neighbours) for continuous variables in 10 datasets, each with 10 iterations [2, 3]. The selection of variables for the final model was performed using least absolute shrinkage and selection operator (LASSO) logistic regression with theory-driven penalization, which have shown to reduce the risk of overfitting compared with other penalization methods (rlassologit command from the lassopack version 1.4.1) [4]. Calibration slopes were calculated with the coefficient of a logistic model for the outcome and the model linear predictor as the independent variable; and calibration-in-the-large was calculated with the intercept of a logistic model for the outcome with the model linear predictor as an offset term.

## Model development

Our aim was to construct a simple predictive score that could be used bedside by clinicians without the need of computers or mobile applications. The model was developed in four stages.

### Stage 1

We assessed the goodness of fit between the outcome and predictors using GAM models. We excluded predictors with a deviance explained below 2% (female gender, diastolic blood pressure, temperature, haemoglobin concentration and platelet count). To avoid multicollinearity problems, when two predictors were highly correlated (such as Alanine transaminase (ALT) and Aspartate transaminase (AST); and white cell count and neutrophil count), we excluded the ones that had lower goodness of fit (ALT and white cell count).

**Table S1.**

| Predictors                        | R <sup>2</sup> | DE    | REML   |          |
|-----------------------------------|----------------|-------|--------|----------|
| Female gender                     | 0.011          | 1.1%  | 2195.1 | Excluded |
| Age-years                         | 0.107          | 10.7% | 1979.4 |          |
| Systolic BP-mm Hg                 | 0.050          | 4.0%  | 1754.8 |          |
| Diastolic BP-mm Hg                | 0.009          | 0.8%  | 1810.2 | Excluded |
| Heart rate-min                    | 0.030          | 2.4%  | 1781.4 |          |
| Respiratory rate-min              | 0.103          | 8.0%  | 1675.4 |          |
| Temperature-°F                    | 0.017          | 1.6%  | 1802.0 | Excluded |
| AST-IU/L                          | 0.084          | 7.3%  | 2057.6 |          |
| ALT-IU/L                          | 0.041          | 3.7%  | 2136.7 | Excluded |
| Albumin-g/dL                      | 0.144          | 13.1% | 1925.6 |          |
| LDH- IU/L                         | 0.147          | 12.1% | 1959.7 |          |
| Creatinine-mg/dL                  | 0.076          | 6.8%  | 2072.6 |          |
| Urea-mg/dL                        | 0.169          | 13.8% | 1919.9 |          |
| C-reactive protein-mg/dL          | 0.370          | 32.0% | 1518.9 |          |
| Sodium-mmol/l                     | 0.156          | 13.4% | 1933.0 |          |
| Haemoglobin-g/dL                  | 0.002          | 0.3%  | 2185.6 | Excluded |
| Platelet count- $\times 10^9/L$   | 0.010          | 0.9%  | 2174.8 | Excluded |
| White cell count- $\times 10^9/L$ | 0.081          | 6.4%  | 2056.5 | Excluded |
| Neutrophil count- $\times 10^9/L$ | 0.129          | 10.3% | 1970.5 |          |
| Lymphocyte count- $\times 10^9/L$ | 0.165          | 14.2% | 1886.9 |          |
| Neutrophil/Lymphocyte ratio       | 0.272          | 23.1% | 1691.2 |          |

DE, deviance explained, REML, restricted maximum likelihood; BP, blood pressure; ALT, Alanine transaminase; AST, Aspartate transaminase; LDH, Lactate dehydrogenase.

## Stage 2

We selected optimal cut-off values to categorize continuous variables based on visual inspection of the GAM models [5], taking into account clinically important points, the laboratory reference range for normal values (we avoided cut-off values within the normal range), cut-off values used in other risk scores, and the distribution of values in the dataset (we avoided placing cut-off values far below the percentile 5 or far above the percentile 95). To minimise the loss of information produced by categorizing continuous variables, we tried to keep similar “risk-distance” between cut-off values (Figures S1-S3 and Table S2).

**Figure S1.** GAM models 1. DE=deviance explained. Vertical lines represent percentile 50 (solid line); 25 and 75 (dashed line ----); 10 and 90 (dotted line .....); 5 and 95 (dashed/dotted lines \_.\_.). Risk denotes the log-odds of the outcome (hypoxaemia or death).

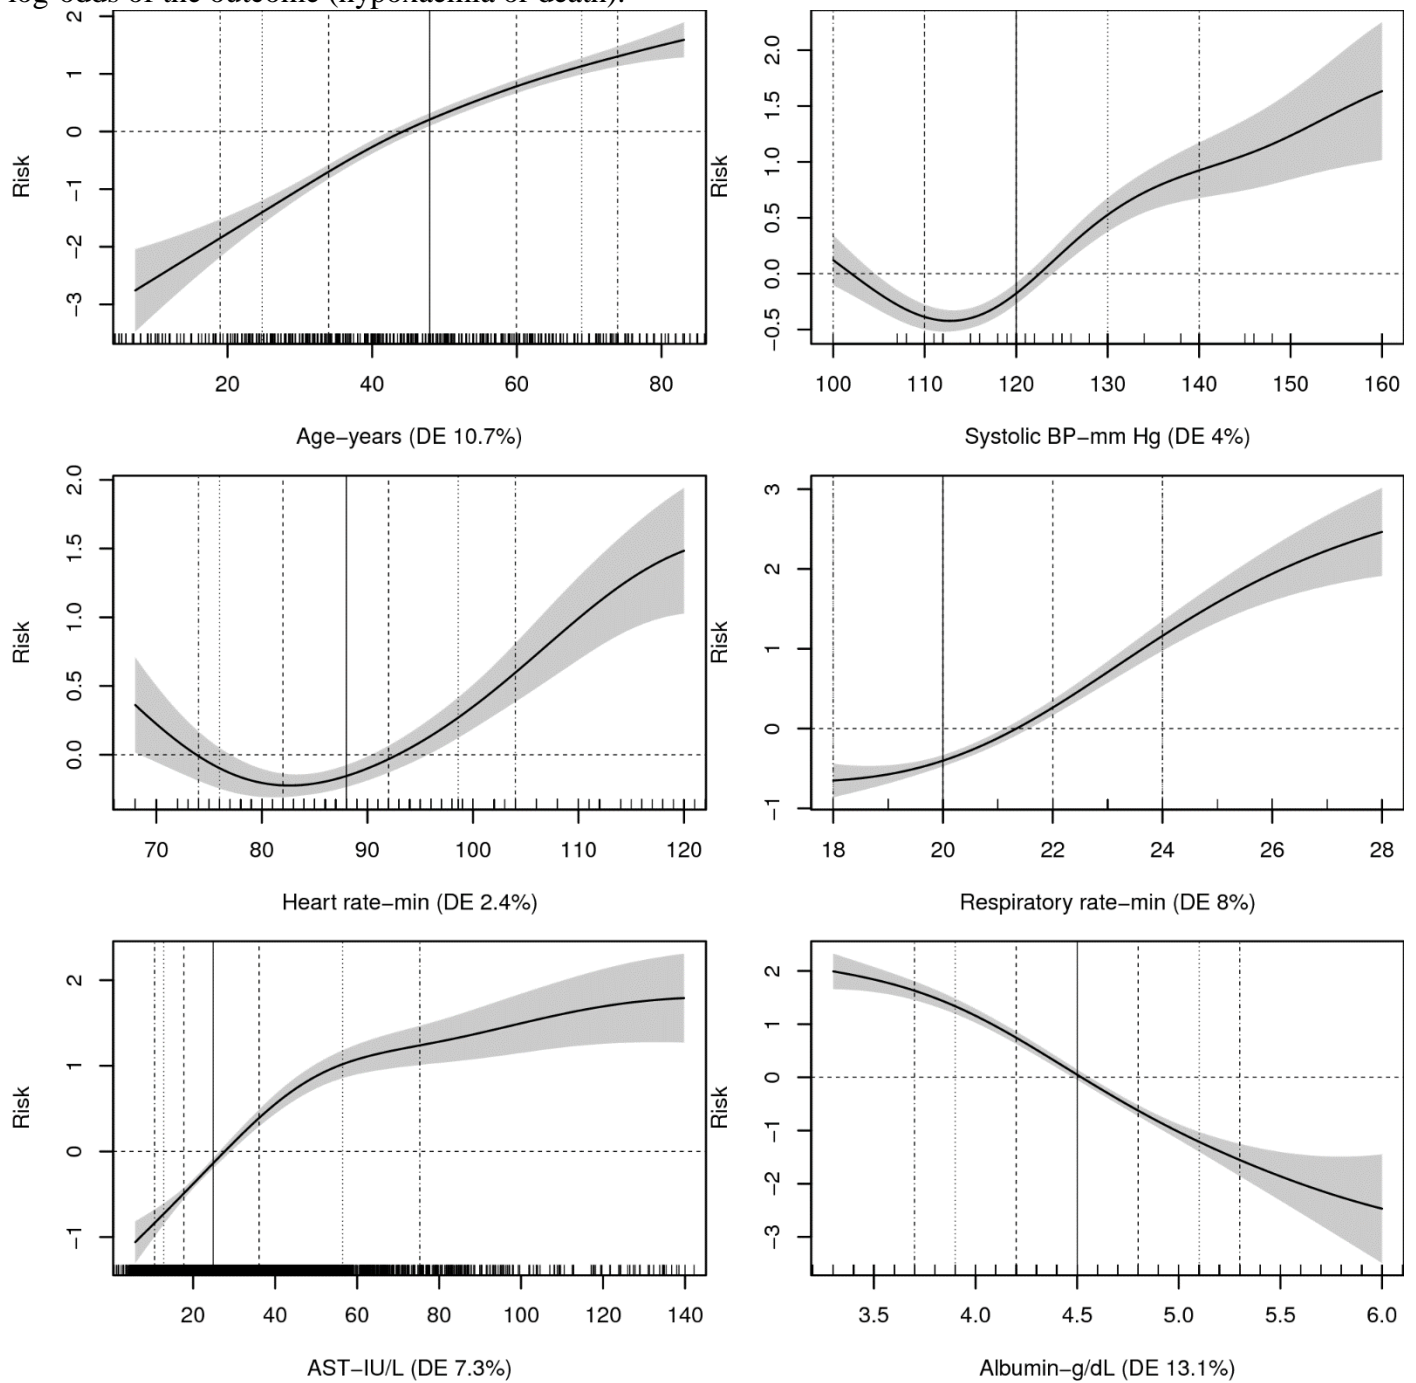

**Figure S2.** GAM models 2. DE=deviance explained. Vertical lines represent percentile 50 (solid line); 25 and 75 (dashed line ----); 10 and 90 (dotted line .....); 5 and 95 (dashed/dotted lines \_.\_.\_)

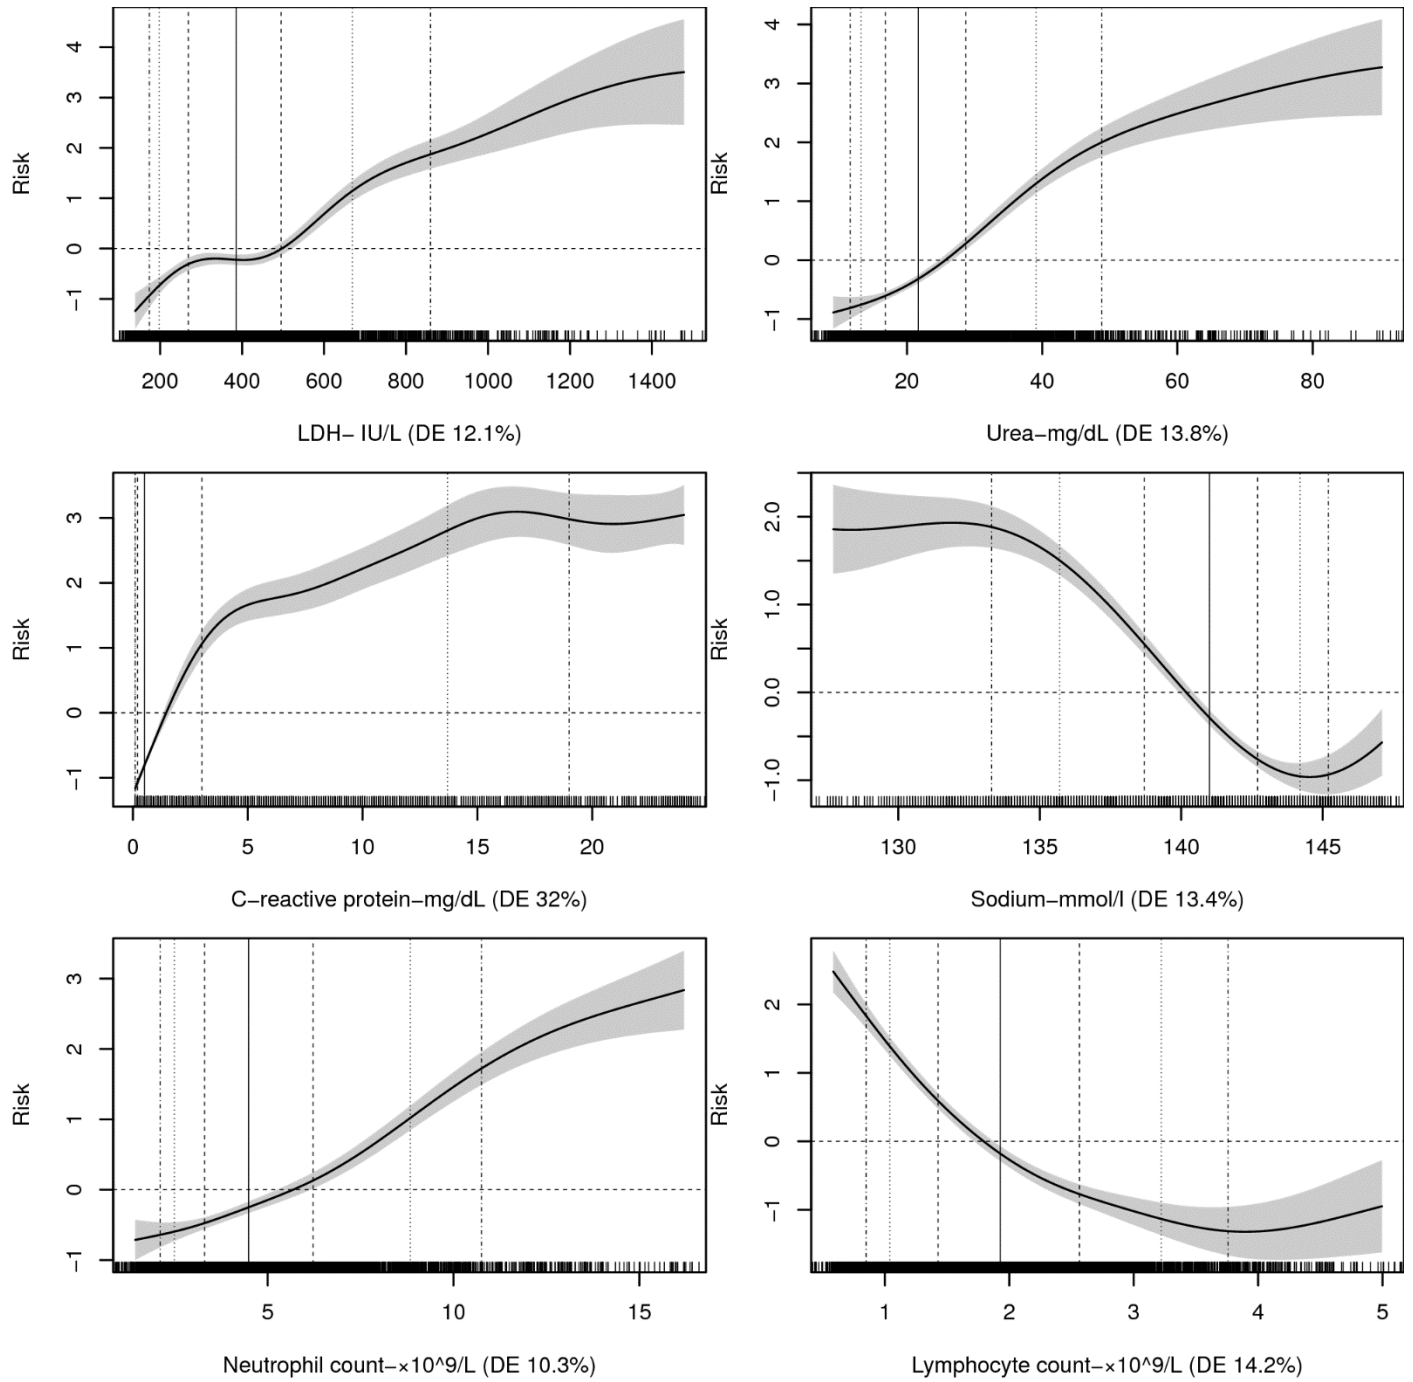

**Figure S3.** GAM models 3. DE=deviance explained. Vertical lines represent percentile 50 (solid line); 25 and 75 (dashed line ----); 10 and 90 (dotted line .....); 5 and 95 (dashed/dotted lines \_.\_.\_)

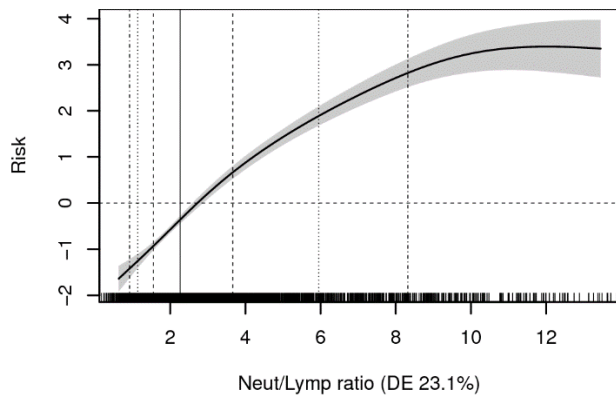

**Table S2.** Selected cut-off values for continuous variables.

|                                   | Laboratory NR | Cut-off          |
|-----------------------------------|---------------|------------------|
| Age-years                         | NA            | 40,50,60,70      |
| Systolic BP-mm Hg                 | NA            | 140              |
| Heart rate-min                    | NA            | 100              |
| Respiratory rate-min              | NA            | 22               |
| AST-IU/L                          | 0-40          | 40, 80           |
| Albumin-g/dL                      | 3.5-5.3       | 3.5              |
| LDH- IU/L                         | 207-414       | 400, 700, 900    |
| Urea-mg/dL                        | 15-39         | 40, 50           |
| C-reactive protein-mg/dL          | 0-0.5         | 0.5,1,2,4,6,9,12 |
| Sodium-mmol/L                     | 135-148       | 135              |
| Neutrophil count- $\times 10^9/L$ | 1.2-8         | 8, 10            |
| Lymphocyte count- $\times 10^9/L$ | 1-5           | 0.8, 1           |
| Neutrophil/Lymphocyte ratio       | NA            | 3,4,6,8          |

NR, normal range; BP, blood pressure; AST, Aspartate transaminase; LDH, Lactate dehydrogenase

### Stage 3

Using the initial cut-off values selected in Stage 2, we performed LASSO logistic regression for each imputed dataset looking for overall agreement to select the cut-off values for the final model [2]. There was a 100% agreement among the imputed datasets. All initial cut-off values were included by the LASSO model except albumin (which was excluded from the final model) and LDH 400 IU/L. See table S3.

**Table S3.** Selection of cut-off values using LASSO regression.

|                                   | Initial selection (Stage 2) | LASSO selection  |
|-----------------------------------|-----------------------------|------------------|
| Age-years                         | 40,50,60,70                 | 40,50,60,70      |
| Systolic BP-mm Hg                 | 140                         | 140              |
| Heart rate-min                    | 100                         | 100              |
| Respiratory rate-min              | 22                          | 22               |
| AST-IU/L                          | 40, 80                      | 40, 80           |
| Albumin-g/dL                      | 3.5                         | Excluded         |
| LDH- IU/L                         | 400, 700, 900               | 700, 900         |
| Urea-mg/dL                        | 40, 50                      | 40, 50           |
| C-reactive protein-mg/dL          | 0.5,1,2,4,6,9,12            | 0.5,1,2,4,6,9,12 |
| Sodium-mmol/L                     | 135                         | 135              |
| Neutrophil count- $\times 10^9/L$ | 8, 10                       | 8, 10            |
| Lymphocyte count- $\times 10^9/L$ | 0.8, 1                      | 0.8, 1           |
| Neutrophil/Lymphocyte ratio       | 3,4,6,8                     | 3,4,6,8          |

BP, blood pressure; AST, Aspartate transaminase; LDH, Lactate dehydrogenase

## Stage 4

We combined logistic regression models from the imputed datasets using Rubin's rules. Coefficients from this logistic model and LASSO penalised coefficients were combined and scaled (x3) to produce the prognostic index.

**Table S4.** LASSO regression, logistic regression coefficients and final prognostic index.

|                                   | Penalised coefficient | Logit coefficient (95% CI) | Prognostic score |
|-----------------------------------|-----------------------|----------------------------|------------------|
| Age (years)                       |                       |                            |                  |
| 40-49                             | 0.16                  | 0.65 (0.32 to 0.98)        | 1                |
| 50-59                             | 0.53                  | 0.98 (0.67 to 1.29)        | 2                |
| 60-69                             | 0.76                  | 1.24 (0.91 to 1.58)        | 3                |
| >=70                              | 0.87                  | 1.38 (0.97 to 1.8)         | 4                |
| Systolic BP (mm Hg)               |                       |                            |                  |
| >= 140                            | 0.32                  | 0.39 (0.02 to 0.76)        | 1                |
| Heart rate (pm)                   |                       |                            |                  |
| >=100                             | 0.19                  | 0.31 (-0.04 to 0.65)       | 1                |
| Respiratory rate (pm)             |                       |                            |                  |
| >=22                              | 0.64                  | 0.77 (0.54 to 1)           | 2                |
| AST-IU/L                          |                       |                            |                  |
| 40-79                             | 0.38                  | 0.43 (0.17 to 0.69)        | 1                |
| >=80                              | 0.61                  | 0.85 (0.38 to 1.32)        | 2                |
| LDH- IU/L                         |                       |                            |                  |
| 700-899                           | 0.3                   | 0.37 (-0.05 to 0.8)        | 1                |
| >=900                             | 0.58                  | 0.71 (0.2 to 1.23)         | 2                |
| Urea-mg/dL                        |                       |                            |                  |
| 40-49.9                           | 0.54                  | 0.61 (0.21 to 1.01)        | 2                |
| >=50                              | 0.95                  | 1.01 (0.55 to 1.48)        | 3                |
| C-reactive protein-mg/dL          |                       |                            |                  |
| 0.5-0.9                           | 0.23                  | 0.73 (0.37 to 1.09)        | 1                |
| 1-1.9                             | 0.61                  | 1.04 (0.69 to 1.4)         | 2                |
| 2-3.9                             | 0.93                  | 1.32 (0.96 to 1.68)        | 3                |
| 4-5.9                             | 1.44                  | 1.83 (1.4 to 2.25)         | 4                |
| 6-8.9                             | 1.82                  | 2.24 (1.79 to 2.69)        | 5                |
| 9-11.9                            | 2.05                  | 2.47 (1.99 to 2.95)        | 6                |
| >=12                              | 2.46                  | 2.8 (2.44 to 3.16)         | 7                |
| Sodium-mmol/L                     |                       |                            |                  |
| <135                              | 0.49                  | 0.46 (0.14 to 0.79)        | 1                |
| Lymphocyte count- $\times 10^9/L$ |                       |                            |                  |
| <0.8                              | 0.86                  | 1.06 (0.54 to 1.58)        | 3                |
| 0.8-0.99                          | 0.24                  | 0.32 (-0.11 to 0.75)       | 1                |
| Neutrophil count- $\times 10^9/L$ |                       |                            |                  |
| 8 - 9.9                           | 0.1                   | 0.25 (-0.17 to 0.66)       | 1                |
| >=10                              | 0.67                  | 0.88 (0.37 to 1.39)        | 2                |
| Neutrophil/Lymphocyte ratio       |                       |                            |                  |
| 3-3.9                             | 0.25                  | 0.36 (0.07 to 0.65)        | 1                |
| 4-5.9                             | 0.47                  | 0.52 (0.19 to 0.84)        | 2                |
| 6-7.9                             | 0.77                  | 0.83 (0.32 to 1.35)        | 3                |
| >=8                               | 1.07                  | 1.15 (0.52 to 1.77)        | 4                |

## Model performance in the development cohort

**Figure S4.** Discrimination in the development cohort.

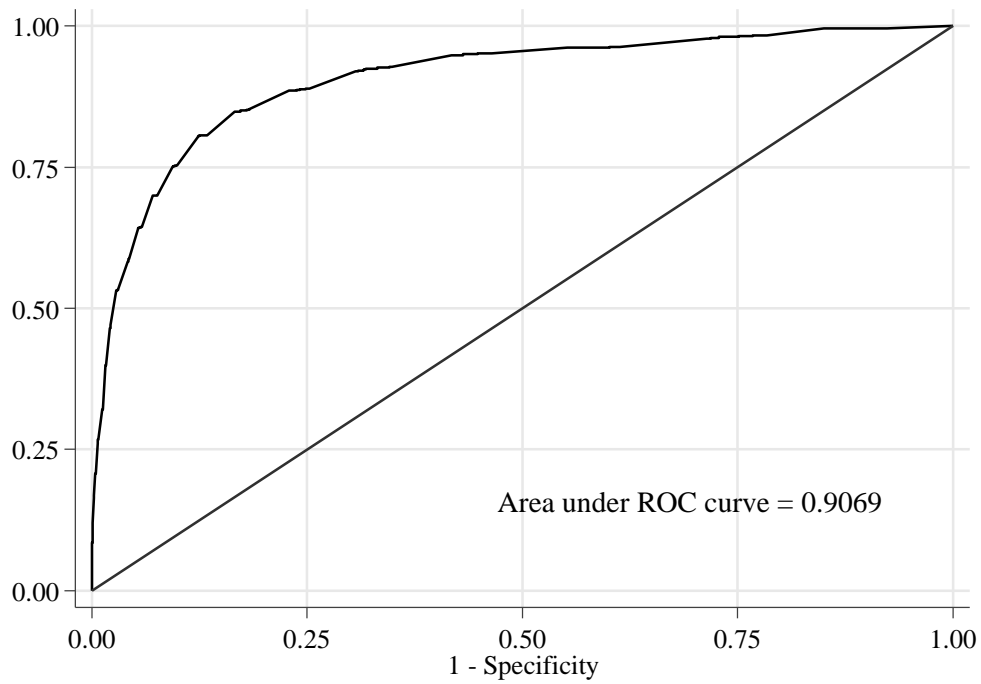

**Figure S5.** Calibration in the development cohort.

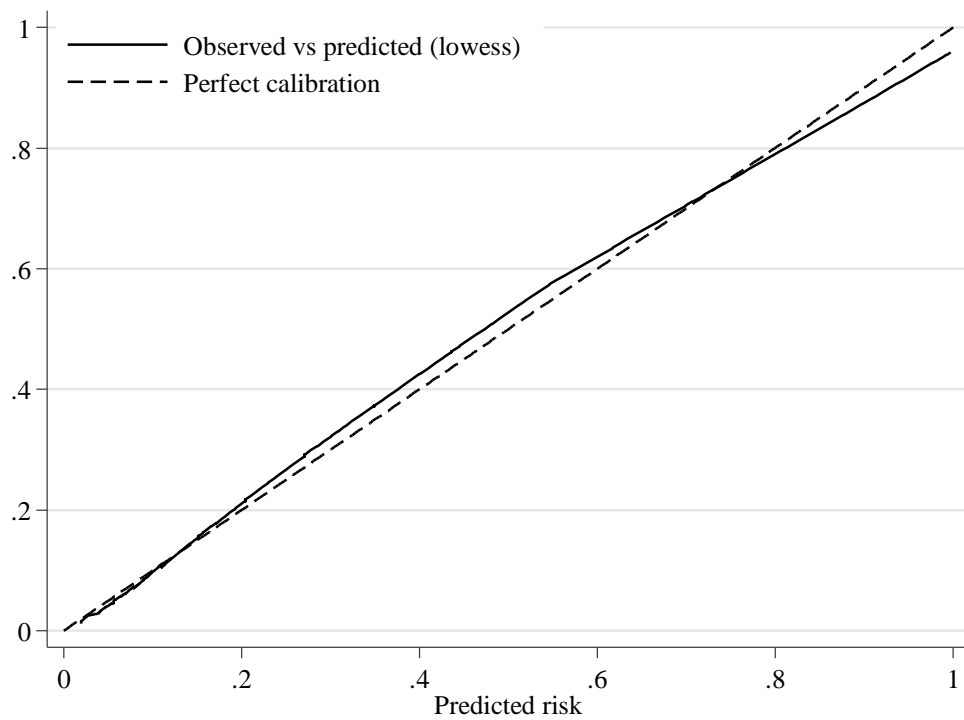



## Predicted risk given by prognostic scores in the validation cohort

**Table S5.** Distribution of patients and predicted risk of the outcome (hypoxaemia or death) and mortality in the validation cohort.

| Prognostic index | Distribution |         |                    | Predicted risk |           |
|------------------|--------------|---------|--------------------|----------------|-----------|
|                  | N            | Percent | Cumulative percent | Outcome        | Mortality |
| 0                | 297          | 14.52   | 14.52              | 2.74%          | 0.05%     |
| 1                | 191          | 9.34    | 23.85              | 3.95%          | 0.07%     |
| 2                | 267          | 13.05   | 36.9               | 5.66%          | 0.10%     |
| 3                | 231          | 11.29   | 48.19              | 8.05%          | 0.14%     |
| 4                | 161          | 7.87    | 56.06              | 11.31%         | 0.19%     |
| 5                | 145          | 7.09    | 63.15              | 15.68%         | 0.26%     |
| 6                | 108          | 5.28    | 68.43              | 21.35%         | 0.35%     |
| 7                | 86           | 4.2     | 72.63              | 28.34%         | 0.49%     |
| 8                | 71           | 3.47    | 76.1               | 36.58%         | 0.67%     |
| 9                | 57           | 2.79    | 78.89              | 45.68%         | 0.92%     |
| 10               | 45           | 2.2     | 81.09              | 55.09%         | 1.26%     |
| 11               | 54           | 2.64    | 83.72              | 64.14%         | 1.73%     |
| 12               | 34           | 1.66    | 85.39              | 72.28%         | 2.36%     |
| 13               | 36           | 1.76    | 87.15              | 79.18%         | 3.23%     |
| 14               | 41           | 2       | 89.15              | 84.72%         | 4.39%     |
| 15               | 49           | 2.39    | 91.54              | 88.99%         | 5.94%     |
| 16               | 24           | 1.17    | 92.72              | 92.18%         | 8.00%     |
| 17               | 25           | 1.22    | 93.94              | 94.50%         | 10.70%    |
| 18               | 30           | 1.47    | 95.41              | 96.16%         | 14.16%    |
| 19               | 17           | 0.83    | 96.24              | 97.34%         | 18.51%    |
| 20               | 20           | 0.98    | 97.21              | 98.16%         | 23.83%    |
| 21               | 10           | 0.49    | 97.7               | 98.73%         | 30.11%    |
| 22               | 17           | 0.83    | 98.53              | 99.13%         | 37.23%    |
| 23               | 15           | 0.73    | 99.27              | 99.40%         | 44.95%    |
| 24               | 9            | 0.44    | 99.71              | 99.59%         | 52.93%    |
| 25               | 4            | 0.2     | 99.9               | 99.72%         | 60.76%    |
| 26               | 1            | 0.05    | 99.95              | 99.81%         | 68.07%    |
| 27               | 1            | 0.05    | 100                | 99.87%         | 74.59%    |

**Figure S6.** Percentage risk increase by one point increase in the prognostic index.

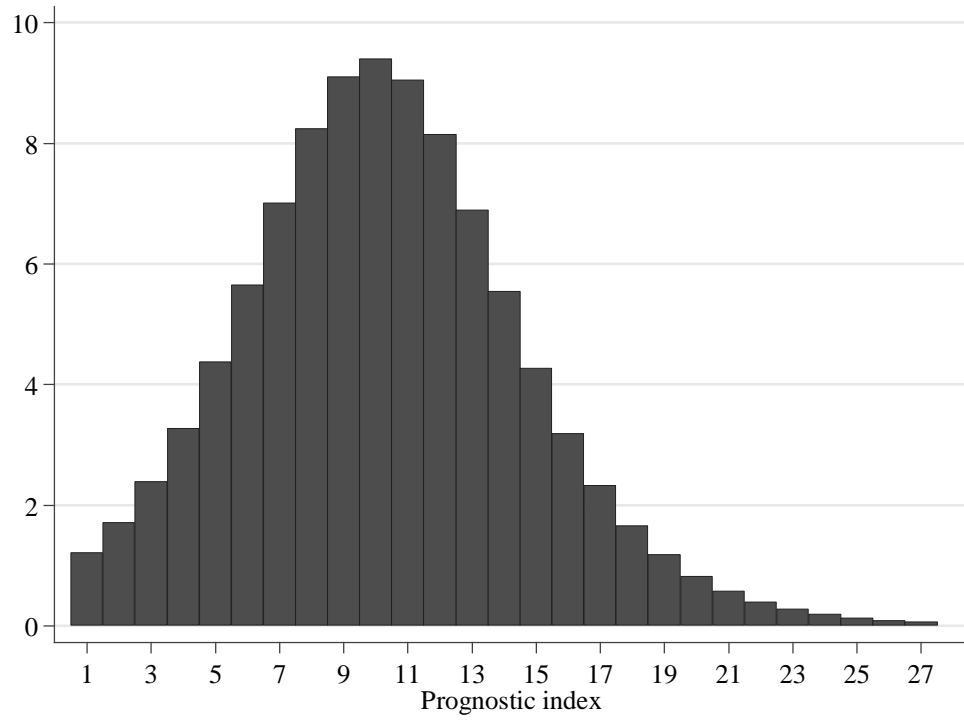

## Model performance to predict mortality in the validation cohort

**Figure S7.** Sensitivity, specificity, negative predictive value and positive predictive value of the predictive model to predict mortality in the validation cohort.

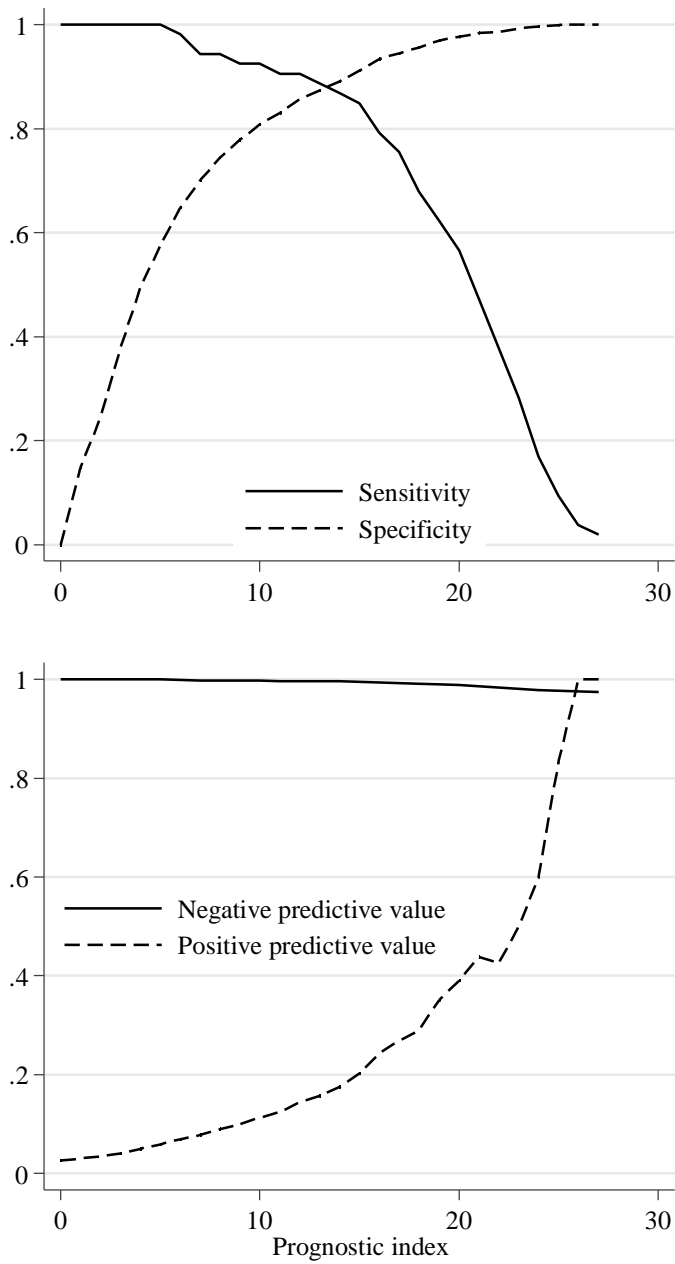

**Figure S8.** Decision curves. Net benefit (upper panel) and number of intervention avoided (lower panel) of the prognostic model for mortality in the validation cohort.

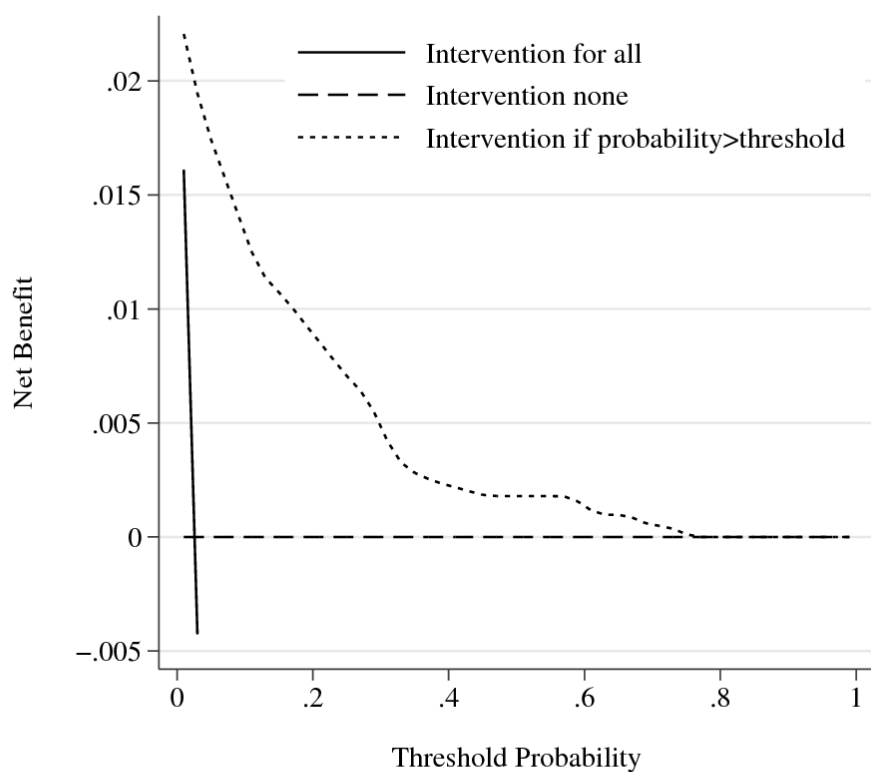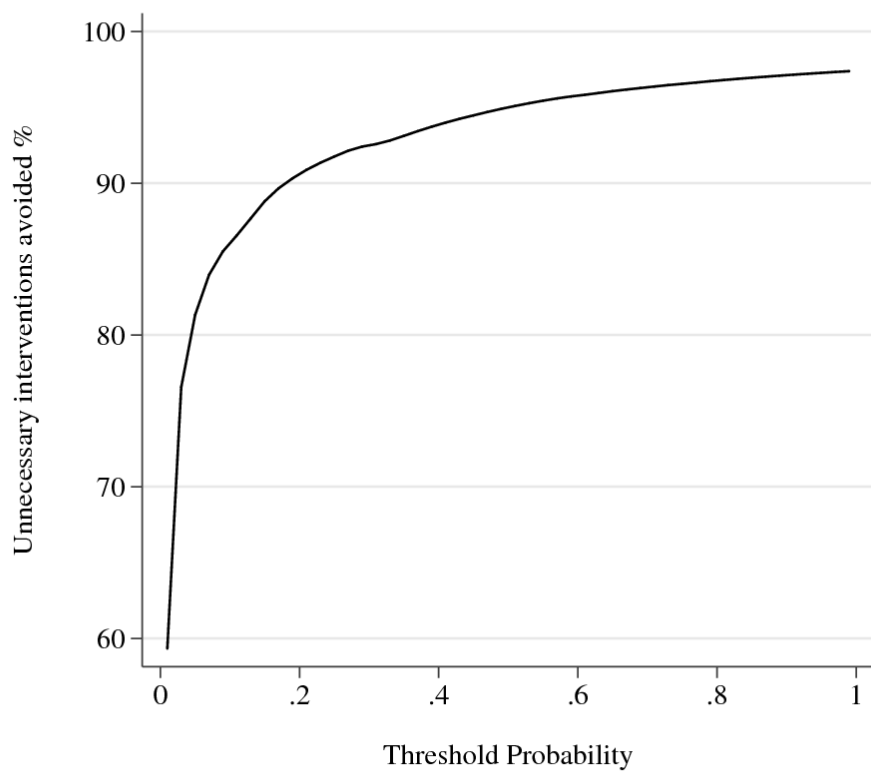

## References

1. Wood SN. Generalized additive models: an introduction with R. CRC press; 2017.
2. Wood AM, White IR, Royston P. How should variable selection be performed with multiply imputed data? *Stat Med.* 2008;27:3227–46.
3. Morris TP, White IR, Royston P. Tuning multiple imputation by predictive mean matching and local residual draws. *BMC Med Res Methodol.* 2014;14:75.
4. Ahrens A, Hansen CB, Schaffer ME. lassopack: Model selection and prediction with regularized regression in Stata. *Stata J.* 2020;20:176–235.
5. Barrio I, Arostegui I, Quintana JM, Group I-C. Use of generalised additive models to categorise continuous variables in clinical prediction. *BMC Med Res Methodol.* 2013;13:83.
